# Supplementary material for: Two Loci Contribute to Age-Related Hearing Loss Resistance in the Japanese Wild-Derived Inbred MSM/Ms Mice
Source: MDPI journal article supplement (doi:10.3390/biomedicines10092221), 2022-09-07
Supplement: s1 [file s1]

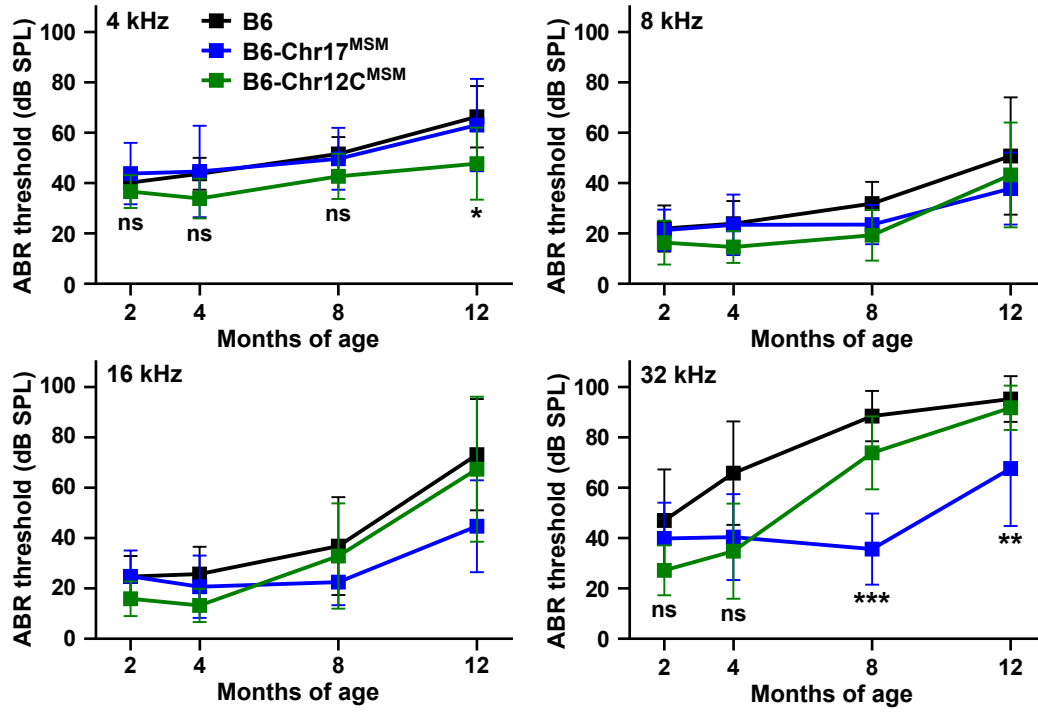

**Figure S1.** Comparison of the ABR thresholds at 4, 8, 16, and 32 kHz sound stimuli among male mice of the B6, B6-Chr17<sup>MSM</sup>, and B6-Chr12C<sup>MSM</sup> strains at 2 (B6,  $n = 15$ ; B6-Chr17<sup>MSM</sup>,  $n = 16$ ; B6-Chr12C<sup>MSM</sup>,  $n = 10$ ), 4 (B6,  $n = 15$ ; B6-Chr17<sup>MSM</sup>,  $n = 15$ ; B6-Chr12C<sup>MSM</sup>,  $n = 10$ ), 8 (B6,  $n = 14$ ; B6-Chr17<sup>MSM</sup>,  $n = 16$ ; B6-Chr12C<sup>MSM</sup>,  $n = 12$ ), and 12 (B6,  $n = 15$ ; B6-Chr17<sup>MSM</sup>,  $n = 18$ ; B6-Chr12C<sup>MSM</sup>,  $n = 11$ ) months of age. The means (squares) and SDs (error bars) of the ABR thresholds are shown. The strain effects by companions of the ABR thresholds between B6-Chr17<sup>MSM</sup> and B6-Chr12C<sup>MSM</sup> strains were considered significant at 4 kHz ( $F_{\text{Strain}(1, 100)} = 13.88$ ,  $p = 0.0003$ ) and 32 kHz ( $F_{\text{Strain}(1, 100)} = 11.97$ ,  $p = 0.0008$ ), and not significant at 8 kHz ( $F_{\text{Strain}(1, 100)} = 1.82$ ,  $p = 0.1803$ ) and 16 kHz ( $F_{\text{Strain}(1, 100)} = 1.833$ ,  $p = 0.1789$ ) by two-way ANOVA. The asterisks and “ns” symbols indicate significant ( $*p < 0.05$ ,  $**p < 0.01$ , and  $***p < 0.001$ ) and no significant differences, respectively, between the ABR thresholds of the B6-Chr17<sup>MSM</sup> and B6-Chr12C<sup>MSM</sup> strains at the same age in each graph, determined using Sidak’ s (4 kHz) and Tukey’ s (32 kHz) multiple comparison tests after two-way ANOVA.

**Table S1.** Simple sequence length polymorphism (SSLP) markers used for genotyping of C57BL/6J (B6) and MSM/Ms (MSM) alleles in generations of the congenic lines of *ahl* loci.

| Chromosome | SSLP marker      | Position (bp, GRCm39) | B6 allele | MSM allele | Forward primer (5'-3')      | Reverse primer (5'-3')      |
|------------|------------------|-----------------------|-----------|------------|-----------------------------|-----------------------------|
| 12         | <i>D12Mit103</i> | 6,006,981–6,007,112   | 131-bp    | > 131-bp*  | ACTATGGTGAAATCATACCCACG     | ATCAATGGATCTTTTTTGGTGG      |
|            | <i>D12Iga11</i>  | 9,081,513–9,081,639   | 123-bp    | < 123-bp*  | GTAATGTGTGGAGTGAACACAGAG    | TAGAGGGAGTTTCATGACAGCTGG    |
|            | <i>D12Iga1</i>   | 11,329,836–11,329,944 | 108-bp    | > 108-bp*  | CTTGTTTTGACCTGCTTGGTCG      | GTCTACAGCAACAACACTAGG       |
|            | <i>D12Mit169</i> | 15,341,026–15,341,142 | 115-bp    | 137-bp     | TTACCCCATATCATATTTTGGTCA    | TTTTAAAATCACATAGCCTGGTAGC   |
|            | <i>D12Iga5</i>   | 21,232,046–21,232,239 | 193-bp    | > 193-bp*  | GCTTCAACTCATTTGAACCTTGAAGG  | ACAGCATGTAGCTGGTGCTGG       |
|            | <i>D12Mit83</i>  | 26,285,176–26,285,320 | 148-bp    | 157-bp     | AGACTGTGGAAAATTAAAAACACAGC  | GTGCACACATATACATGCAAACA     |
|            | <i>D12Mit136</i> | 30,223,737–30,223,883 | 145-bp    | 156-bp     | TTTAATTTTGAGTGGGTTTGGC      | TTGCTACATGTACACTGATCTCCA    |
|            | <i>D12Mit146</i> | 33,238,577–33,238,728 | 152-bp    | 141-bp     | ACCCCCATTTCTTTACAATTCC      | CAAATATGGAAAAAGCATATGTGT    |
|            | <i>D12Mit222</i> | 38,827,281–38,827,392 | 113-bp    | 86-bp      | TTTAAAAACAACAACAACAAAAAAGG  | ATCTGGGTTTTGAAATAAGAGCC     |
|            | <i>D12Iga6</i>   | 44,426,633–44,426,787 | 154-bp    | < 154-bp*  | GGTCAATCCTAAACACATGTGC      | CATTATACATACTTCCCTACCCATCCC |
|            | <i>D12Mit64</i>  | 50,505,009–50,505,146 | 140-bp    | 124-bp     | CTCCTTGAGATCTGAACACTTGT     | GGGCTGGTGGTTTGTCTCT         |
|            | <i>D12Mit126</i> | 53,075,369–53,075,504 | 137-bp    | 153-bp     | GGATTATAGGCATGCACTAGGC      | TGGGGAGGTGGGTATTAACA        |
|            | <i>D12Mit190</i> | 59,775,252–59,775,378 | 125-bp    | 111-bp     | CCCTTGCTATCTTTCAAACCC       | TCATAGCAGGTTTATAGGATGTGTG   |
|            | <i>D12Mit69</i>  | 65,510,916–65,511,019 | 107-bp    | 98-bp      | GAAGAGAGGACATTGCACTGG       | AGTTACTGAAGCATAGACCAACCC    |
|            | <i>D12Mit34</i>  | 69,846,626–69,846,796 | 173-bp    | 162-bp     | GACCACCAGGGCTATTACACA       | TGCCAATCTTCACTCATGTACC      |
| 17         | <i>D17Mit246</i> | 8,678,516–8,678,617   | 102-bp    | 110-bp     | GTGGTCTATTTTAAAAAATGAAAAACG | GAGAACCAACTTCAACAAGTTGC     |
|            | <i>D17Mit81</i>  | 31,123,372–31,123,496 | 122-bp    | 102-bp     | CAATCTATCTCATATGCATCTCTGTG  | GTCTGGTGCACCTGTCCTC         |
|            | <i>D17Mit176</i> | 43,051,185–43,051,352 | 171-bp    | 109-bp     | GCCTAACTAGACTACAAGCCTTGC    | GTAGGTACATACAACCCACATACAGG  |
|            | <i>D17Mit274</i> | 53,845,536–53,845,735 | 199-bp    | < 199-bp*  | ACTCCTTNGGGACCTGCATT        | ACCGCTCAGGGAGTGCATT         |
|            | <i>D17Mit20</i>  | 57,534,447–57,534,623 | 177-bp    | 193-bp     | AGAACAGGACACCGGACATC        | TCATAAGTAGGCACACCAATGC      |
|            | <i>D17Mit150</i> | 59,260,956–59,261,068 | 114-bp    | 128-bp     | CTGTTGGATTTCATTCATTTAGTGG   | TATAGGGACAACTCCCTGATAGG     |
|            | <i>D17Mit4</i>   | 62,262,073–62,262,170 | 95-bp     | 102-bp     | GCTGTGCTTCCACACTCAGT        | TTTCTGAAAAAGCCTCTCAA        |
|            | <i>D17Mit253</i> | 63,248,701–63,248,931 | 230-bp    | 218-bp     | GTGACTGAGGGAGTCATT          | CAAGAGAATCACACATATTG        |
|            | <i>D17Mit89</i>  | 63,946,030–63,946,144 | 113-bp    | 136-bp     | TCAAGTCACAACTGGGACCA        | TTGAAATTCTGCCACAGATATCT     |
|            | <i>D17Mit91</i>  | 65,637,246–65,637,357 | 104-bp    | 110-bp     | GGTTGTTCTCTGGGATCTGC        | TTTTCCACTTCAAAAAGGTTAGTG    |
|            | <i>D17Mit53</i>  | 67,480,210–67,480,344 | 136-bp    | 126-bp     | ATTAGTCCATCACAATGATTTGG     | TTTTGCACAGGAATAGAAACCC      |
|            | <i>D17Mit185</i> | 68,758,425–68,758,612 | 188-bp    | 180-bp     | AAAAGGGACAACATACCCAGG       | CATCCACTCTGCTTGTATTAGGG     |
|            | <i>D17Mit256</i> | 69,733,483–69,733,606 | 124-bp    | < 124-bp*  | GTGACTGAGGGAGTCATTATGGC**   | CAAGAGAATCACACATATTGGAC**   |
|            | <i>D17Mit141</i> | 73,801,567–73,801,676 | 111-bp    | 95-bp      | TTGTATTTGTGTATCTGTAAGCATGC  | AAATATGACAAGTTGTGTCCTAGCC   |
|            | <i>D17Mit74</i>  | 80,049,879–80,050,031 | 157-bp    | 130-bp     | CTTCCTTCGTTCCCTTCATTCC      | CTCTGGAACTACATGGTGCTG       |
|            | <i>D17Mit41</i>  | 84,643,031–84,643,233 | 203-bp    | 222-bp     | TGCTTGCTGCTTTCTCAGAA        | GATCTGCCTGTCTCCTTAGTGC      |
|            | <i>D17Mit123</i> | 93,507,047–93,507,179 | 131-bp    | 159-bp     | CACAAGGAGGGAGCCTGTAG        | CACCGTAAGAGTCTAATAATAAGGGG  |

\*The alleles indicate the size differences detected by agarose gel electrophoresis.

\*\*The primer sequences were redesigned.

**Table S2.** Single nucleotide polymorphism (SNP) markers used for genotyping of B6 and MSM alleles in generations of the congenic lines of *ahl* loci.

| Chromosome | SNP ID      | Position<br>(bp, GRCh38) | Allele |     | Forward primer (5'-3')     | Reverse primer (5'-3')     |
|------------|-------------|--------------------------|--------|-----|----------------------------|----------------------------|
|            |             |                          | B6     | MSM |                            |                            |
| 12         | rs13462802  | 9,629,170                | A      | G   | CAAAACCTTGCCAGCACCGGTACCC  | CACTGTGGGCAGGCCATTCACTGCC  |
|            | rs29147141  | 9,757,239                | A      | G   | TGTGGCGAGAAACCAAGGTAACAC   | GCATCACATGAGCTGAAGTAGTATC  |
|            | rs240733211 | 9,904,384                | C      | T   | GTCCATCCCTCTAAACACAATGGAG  | ACAAGCACTAGACAGCAAGCCAGAG  |
|            | rs36642807  | 10,049,821               | C      | T   | ACCAAGAAGTGTGATCCCAGAGAAG  | TCAGCTGGCATTACCTGTCACAGG   |
|            | NA*         | 10,132,533               | T      | G   | ATCAAAACATGAGTATGAGGGCTTG  | TGTGTGTATATGCTGGGGATCTGAG  |
| 17         | NA          | 10,444,646               | C      | T   | TGCAGTTTGGAGTGAACCATCTGGG  | TCCAAGGAGAAGATTGGTGAGTAGG  |
|            | rs29514721  | 52,211,146               | C      | T   | AGGATGCACATCAGGGTACACAGAG  | CTGTGCATGTGCTACAGAGCGGAAG  |
|            | rs29663331  | 52,813,673               | T      | C   | CCCTGCAGCGCTCCTTGTGGCTTTC  | CCTTTTCTCAGGCATCACATAATCC  |
|            | rs236845319 | 53,306,617               | C      | T   | CCCCAGATATCTGTGCCTCCTGGTG  | AGAATCAGAAGGAAGAGGTCATAGG  |
|            | rs107832179 | 53,306,620               | C      | T   | CTCAGAGGTGCTAATATGGGTGGTG  | GTTAGTAATGTTTGGCAGGCCTGAG  |
|            | rs108659421 | 53,705,721               | C      | T   | GGGTTCCCAACCCGCCGGCTTAGAG  | CTCAGTACCACCATTGTTATCTGGG  |
|            | rs108515592 | 53,785,930               | A      | G   | TCCCGGTCTAAGGAATGGTTTTCAC  | CAGCAAACAGTGCTACAAAGACTCC  |
|            | rs46197349  | 53,814,813               | G      | A   | TGGTCTGATGCAAGCCAGGTCATCC  | GGGATAGCAGGCTCTGGTCAGGACC  |
|            | rs47518120  | 57,305,460               | T      | C   | GGAGTTTCCCTGAAATTTTCATCTCC | TGCTAACACTTTATTGATGTACCTC  |
|            | rs264410846 | 57,305,472               | A      | C   | TCTACTGAGGAGCCATATAAACCGG  | CTCAAAGGGACTATGAACACTTGGG  |
|            | rs108361393 | 60,304,776               | A      | G   | TTGTTCAAGTGAAATACAGAGGAGG  | ACTGGATTAAAGGAAGTGAAGAAGG  |
|            | rs262014614 | 60,407,268               | C      | T   | CATAACACAGCAAAGAGCCAATGGG  | CTCACAATCCTAGAGCTTCCTTGAG  |
|            | rs220895080 | 60,512,297               | A      | G   | GAGTTGTCCACTCTTTCCTTGTTCTG | GTAGGAGGAATGAGAACAATGGAGG  |
|            | rs108786555 | 60,812,085               | T      | C   | TTTCATCCCCATTCCTCCATCACTG  | CTTGGTGGCTTACATTTACAGAGGG  |
|            | rs108804059 | 60,812,097               | T      | C   | CATAACTCCTGCGGCAGGGCATCTG  | TGTCACAACTGTGCAGGTACCTGGG  |
|            | rs108073246 | 61,311,171               | A      | C   | AATCCTGAGCAAATGGTTTCTAACC  | ACATGACACCTTCTAGAAAACACTC  |
|            | rs107710832 | 61,812,175               | C      | T   | GCCTCTCCAGAGATTTACAGCACC   | CGCTACATAAACCCCTCTAATCTCCC |
|            | rs108140441 | 63,277,157               | T      | C   | AAGCCACACGTCACACATGCCAC    | CAGTCACTGTGTGGATTAGCCTCAC  |
|            | rs231820494 | 63,310,397               | C      | T   | TTTGGGGCATATCTCATTTGGAAGT  | TATATGAGGACATTCATCCACAGGG  |
|            | rs237461892 | 63,409,058               | G      | A   | CTAGAGGGCGCAGTTGCGTTAACTG  | CATTTTGGGGTTTGGGTTCTCCTTG  |
|            | rs108274381 | 63,509,598               | G      | A   | AGCTGTGCTGTGTGCAGCATGGCAG  | GACTGCCTGTCTGTCCAGCACAATG  |
|            | rs245957064 | 63,711,574               | G      | A   | CTCTTAGTCAACGAACCATCTCTCC  | AGCTTCTACCATAACACCGAAAGCC  |
|            | rs50195359  | 64,110,812               | C      | T   | ATCTGCACGGAGACAGAGTGATGCC  | CACTAGGAAAAGAGGGACACAGCAGC |
|            | rs223120600 | 64,559,156               | C      | A   | CTTGCTCCAGGCAGTCTTCTACTC   | GGATTTTGAATTCGGGACTGTCTATC |
|            | rs46840662  | 66,643,823               | T      | C   | CAGTCTTCAGGGCTGGGTAGCTGAG  | CTGTACTCTAGAGAGTGGGGACAGG  |
|            | rs238225225 | 66,757,336               | A      | G   | CTGTCTCTGCTGTACCTCATCCC    | TTTCTCAGAGACAGAGTACGCCAC   |
|            | rs33702452  | 67,110,625               | A      | G   | CAGTGACAGCTGTCTTGTGCTGCAC  | TGATACCTTGTCTCTAAGGCTTCC   |
|            | rs51713859  | 67,937,864               | C      | T   | CCAGCTGCAGAAGAGAGCCCCATGGG | ACAGTTACATCCTGCTTGAGCCAGG  |
|            | rs46754501  | 67,939,859               | A      | G   | TGTCTGGGTGATGTCTATCTGTCTC  | CCAGGTGGTGTCTTCTGTGCTCTAC  |
|            | rs48681006  | 68,306,726               | G      | A   | CTTGATGATACTCCTGGGACTAGG   | AAGTCACGTTAGAGGGACACGTAGG  |
|            | rs108475928 | 68,820,252               | A      | C   | CTACCAAGCATCCCTACTCCTCAG   | AAGTCTCTCATGACTAAGCCAGG    |
|            | rs219141467 | 69,419,671               | C      | T   | TGCCCATTTTAAGTAGGTCATTGG   | ACATCAGGGTGTATGTATACACTTG  |
|            | rs48686235  | 69,599,668               |        |     |                            |                            |
|            | rs50108016  | 69,699,066               |        |     |                            |                            |

\*NA, Not annotated.

**Table S3.** SNPs used for linkage analysis of the loci associated with ARHL resistance of C57BL/6J-Chr12C<sup>MSM</sup>/Ms (B6-Chr12C<sup>MSM</sup>) strain.

| SNP ID            | Position<br>(bp, GRCm39) | Allele |     | SNP ID            | Position<br>(bp, GRCm39) | Allele |     |
|-------------------|--------------------------|--------|-----|-------------------|--------------------------|--------|-----|
|                   |                          | B6     | MSM |                   |                          | B6     | MSM |
| <i>rs50764161</i> | 3,337,722                | A      | G   | <i>rs47371162</i> | 47,260,614               | C      | T   |
| <i>rs36622082</i> | 6,929,135                | G      | T   | <i>rs31737371</i> | 48,435,755               | T      | A   |
| <i>rs37903846</i> | 11,126,865               | C      | T   | <i>rs29166012</i> | 50,624,504               | T      | C   |
| <i>rs50765676</i> | 13,137,086               | T      | C   | <i>rs50212735</i> | 50,881,708               | G      | A   |
| <i>rs49237917</i> | 15,782,050               | G      | A   | <i>rs52013132</i> | 52,557,694               | C      | T   |
| <i>rs51940660</i> | 31,039,254               | T      | C   | <i>rs48374396</i> | 52,960,273               | T      | G   |
| <i>rs50070279</i> | 32,478,428               | A      | G   | <i>rs51589552</i> | 54,632,477               | G      | A   |
| <i>rs47379643</i> | 32,484,388               | G      | C   | <i>rs31956789</i> | 58,103,451               | G      | A   |
| <i>rs31644585</i> | 34,996,266               | G      | A   | <i>rs46243707</i> | 62,269,744               | C      | A   |
| <i>rs36408407</i> | 37,640,036               | G      | A   | <i>rs52560443</i> | 64,532,806               | A      | G   |
| <i>rs36244327</i> | 40,054,917               | A      | C   | <i>rs32174021</i> | 67,212,252               | A      | G   |
| <i>rs29187114</i> | 42,243,063               | A      | G   | <i>rs36287012</i> | 68,655,987               | G      | T   |
| <i>rs37058940</i> | 42,439,730               | G      | T   | <i>rs48876788</i> | 72,152,821               | C      | T   |
| <i>rs46833947</i> | 45,947,086               | A      | C   |                   |                          |        |     |

**Table S4.** Age, frequency, and their interaction effects on the ABR thresholds detected by two-way ANOVA analysis between 1 month of age (1M) and each corresponding age in male mice of the B6 and MSM strains, and the age effects on the same frequency detected by Sidak's and Tukey's multiple comparisons tests after two-way ANOVA.

| Strain | Months of age for comparison | Mean difference $\pm$ SD with 1M (dB SPL) | Source of variation    | 1M vs Each corresponding age |                |                | Multiple comparisons test |             |             |             |
|--------|------------------------------|-------------------------------------------|------------------------|------------------------------|----------------|----------------|---------------------------|-------------|-------------|-------------|
|        |                              |                                           |                        | df                           | <i>F</i> value | <i>p</i> value | 4 kHz                     | 8 kHz       | 16 kHz      | 32 kHz      |
| B6     | 2                            | 4.286 $\pm$ 14.91                         | Age                    | 1, 92                        | 3.408          | 0.0681         | -                         | -           | -           | -           |
|        |                              |                                           | Frequency              | 3, 92                        | 22.91          | < 0.0001***    |                           |             |             |             |
|        |                              |                                           | Frequency $\times$ Age | 3, 92                        | 0.9065         | 0.4411         |                           |             |             |             |
|        | 4                            | 10.57 $\pm$ 18.62                         | Age                    | 1, 92                        | 18.2           | < 0.0001***    | 0.9885                    | 0.892       | 0.9997      | < 0.0001*** |
|        |                              |                                           | Frequency              | 3, 92                        | 33.66          | < 0.0001***    |                           |             |             |             |
|        |                              |                                           | Frequency $\times$ Age | 3, 92                        | 6.36           | 0.0006***      |                           |             |             |             |
|        | 8                            | 22.98 $\pm$ 21.32                         | Age                    | 1, 88                        | 90.78          | < 0.0001***    | 0.2019                    | 0.0646      | 0.1113      | < 0.0001*** |
|        |                              |                                           | Frequency              | 3, 88                        | 49.84          | < 0.0001***    |                           |             |             |             |
|        |                              |                                           | Frequency $\times$ Age | 3, 88                        | 15.92          | < 0.0001***    |                           |             |             |             |
|        | 12                           | 42.16 $\pm$ 21.21                         | Age                    | 1, 92                        | 154.2          | < 0.0001***    | 0.0035**                  | 0.0001***   | < 0.0001*** | < 0.0001*** |
|        |                              |                                           | Frequency              | 3, 92                        | 15             | < 0.0001***    |                           |             |             |             |
|        |                              |                                           | Frequency $\times$ Age | 3, 92                        | 4.605          | 0.0048**       |                           |             |             |             |
|        | 16                           | 54.91 $\pm$ 15.59                         | Age                    | 1, 80                        | 448.6          | < 0.0001***    | < 0.0001***               | < 0.0001*** | < 0.0001*** | < 0.0001*** |
|        |                              |                                           | Frequency              | 3, 80                        | 16.92          | < 0.0001***    |                           |             |             |             |
|        |                              |                                           | Frequency $\times$ Age | 3, 80                        | 3.427          | 0.021*         |                           |             |             |             |
|        | 20                           | 62.76 $\pm$ 11.56                         | Age                    | 1, 96                        | 1176           | < 0.0001***    | < 0.0001***               | < 0.0001*** | < 0.0001*** | < 0.0001*** |
|        |                              |                                           | Frequency              | 3, 96                        | 22.12          | < 0.0001***    |                           |             |             |             |
|        |                              |                                           | Frequency $\times$ Age | 3, 96                        | 1.859          | 0.1418         |                           |             |             |             |
|        | 24                           | 67.23 $\pm$ 10.42                         | Age                    | 1, 72                        | 1339           | < 0.0001***    | < 0.0001***               | < 0.0001*** | < 0.0001*** | < 0.0001*** |
|        |                              |                                           | Frequency              | 3, 72                        | 12.35          | < 0.0001***    |                           |             |             |             |
|        |                              |                                           | Frequency $\times$ Age | 3, 72                        | 5.47           | 0.0019**       |                           |             |             |             |
| MSM    | 2                            | -1.319 $\pm$ 10.97                        | Age                    | 1, 80                        | 0.8176         | 0.3686         | -                         | -           | -           | -           |
|        |                              |                                           | Frequency              | 3, 80                        | 46.47          | < 0.0001***    |                           |             |             |             |
|        |                              |                                           | Frequency $\times$ Age | 3, 80                        | 0.206          | 0.892          |                           |             |             |             |
|        | 4                            | 8.380 $\pm$ 12.57                         | Age                    | 1, 92                        | 18.16          | < 0.0001***    | 0.0938                    | 0.2204      | 0.1518      | 0.1027      |
|        |                              |                                           | Frequency              | 3, 92                        | 23.68          | < 0.0001***    |                           |             |             |             |
|        |                              |                                           | Frequency $\times$ Age | 3, 92                        | 0.03164        | 0.9924         |                           |             |             |             |
|        | 8                            | 6.474 $\pm$ 12.05                         | Age                    | 1, 76                        | 24.19          | < 0.0001***    | 0.0001***                 | 0.7342      | 0.9965      | 0.1924      |
|        |                              |                                           | Frequency              | 3, 76                        | 78.91          | < 0.0001***    |                           |             |             |             |
|        |                              |                                           | Frequency $\times$ Age | 3, 76                        | 3.332          | 0.0239*        |                           |             |             |             |
|        | 12                           | 9.594 $\pm$ 13.01                         | Age                    | 1, 88                        | 55.37          | < 0.0001***    | < 0.0001***               | 0.179       | 0.3612      | 0.0015**    |
|        |                              |                                           | Frequency              | 3, 88                        | 37.47          | < 0.0001***    |                           |             |             |             |
|        |                              |                                           | Frequency $\times$ Age | 3, 88                        | 2.326          | 0.0802         |                           |             |             |             |
|        | 16                           | 9.236 $\pm$ 11.79                         | Age                    | 1, 76                        | 39.41          | < 0.0001***    | 0.0004***                 | 0.1129      | 0.2828      | 0.0001***   |
|        |                              |                                           | Frequency              | 3, 76                        | 55.76          | < 0.0001***    |                           |             |             |             |
|        |                              |                                           | Frequency $\times$ Age | 3, 76                        | 1.793          | 0.1557         |                           |             |             |             |
|        | 20                           | 12.25 $\pm$ 13.08                         | Age                    | 1, 72                        | 34.25          | < 0.0001***    | 0.001***                  | 0.0071**    | 0.2004      | 0.039*      |
|        |                              |                                           | Frequency              | 3, 72                        | 26.13          | < 0.0001***    |                           |             |             |             |
|        |                              |                                           | Frequency $\times$ Age | 3, 72                        | 0.6618         | 0.5782         |                           |             |             |             |
|        | 24                           | 11.77 $\pm$ 14.04                         | Age                    | 1, 72                        | 24.61          | < 0.0001***    | 0.0119*                   | 0.0426*     | 0.5611      | 0.0198*     |
|        |                              |                                           | Frequency              | 3, 72                        | 20.88          | < 0.0001***    |                           |             |             |             |
|        |                              |                                           | Frequency $\times$ Age | 3, 72                        | 0.6183         | 0.6054         |                           |             |             |             |

\* $p < 0.05$ , \*\* $p < 0.01$ , and \*\*\* $p < 0.001$ .

**Table S5.** Age, frequency, and their interaction effects on the DPOAE amplitudes detected by two-way ANOVA analysis between 1 month of age (1M) and each corresponding age in male mice of the B6 and MSM strains, and the age effects on the same frequency detected by Sidak's and Tukey's multiple comparisons tests after two-way ANOVA.

| Strain | Months of age for comparison | Mean difference $\pm$ SD with 1M (dB SPL) | Source of variation    | 1M vs each corresponding age |         |             | Multiple comparisons test |             |             |             |             |
|--------|------------------------------|-------------------------------------------|------------------------|------------------------------|---------|-------------|---------------------------|-------------|-------------|-------------|-------------|
|        |                              |                                           |                        | df                           | F value | p value     | 8 kHz                     | 11.3 kHz    | 16 kHz      | 22.6 kHz    | 32 kHz      |
| B6     | 2                            | -5.071 $\pm$ 11.34                        | Age                    | 1, 100                       | 14.39   | 0.0003***   | 0.0175*                   | 0.0997      | 0.6052      | 0.9997      | 0.512       |
|        |                              |                                           | Frequency              | 4, 100                       | 45.55   | < 0.0001*** |                           |             |             |             |             |
|        |                              |                                           | Frequency $\times$ Age | 4, 100                       | 1.081   | 0.3701      |                           |             |             |             |             |
|        | 4                            | -1.922 $\pm$ 13.53                        | Age                    | 1, 115                       | 1.298   | 0.257       | -                         | -           | -           | -           | -           |
|        |                              |                                           | Frequency              | 4, 115                       | 30.51   | < 0.0001*** |                           |             |             |             |             |
|        |                              |                                           | Frequency $\times$ Age | 4, 115                       | 5.048   | 0.0009***   |                           |             |             |             |             |
|        | 8                            | 14.12 $\pm$ 15.71                         | Age                    | 1, 110                       | 43.1    | < 0.0001*** | 0.9641                    | 0.9635      | 0.2797      | < 0.0001*** | < 0.0001*** |
|        |                              |                                           | Frequency              | 4, 110                       | 14.98   | < 0.0001*** |                           |             |             |             |             |
|        |                              |                                           | Frequency $\times$ Age | 4, 110                       | 10.12   | < 0.0001*** |                           |             |             |             |             |
|        | 12                           | 24.26 $\pm$ 13.13                         | Age                    | 1, 115                       | 252.7   | < 0.0001*** | > 0.9999                  | 0.0131*     | < 0.0001*** | < 0.0001*** | < 0.0001*** |
|        |                              |                                           | Frequency              | 4, 115                       | 18.79   | < 0.0001*** |                           |             |             |             |             |
|        |                              |                                           | Frequency $\times$ Age | 4, 115                       | 25.96   | < 0.0001*** |                           |             |             |             |             |
|        | 16                           | 32.97 $\pm$ 9.682                         | Age                    | 1, 90                        | 588     | < 0.0001*** | 0.001***                  | < 0.0001*** | < 0.0001*** | < 0.0001*** | < 0.0001*** |
|        |                              |                                           | Frequency              | 4, 90                        | 12.62   | < 0.0001*** |                           |             |             |             |             |
|        |                              |                                           | Frequency $\times$ Age | 4, 90                        | 14.58   | < 0.0001*** |                           |             |             |             |             |
| MSM    | 2                            | 1.397 $\pm$ 13.77                         | Age                    | 1, 120                       | 1.097   | 0.2971      | -                         | -           | -           | -           | -           |
|        |                              |                                           | Frequency              | 4, 120                       | 75.84   | < 0.0001*** |                           |             |             |             |             |
|        |                              |                                           | Frequency $\times$ Age | 4, 120                       | 0.08556 | 0.9868      |                           |             |             |             |             |
|        | 4                            | 1.315 $\pm$ 13.61                         | Age                    | 1, 120                       | 1.007   | 0.3176      | -                         | -           | -           | -           | -           |
|        |                              |                                           | Frequency              | 4, 120                       | 76.68   | < 0.0001*** |                           |             |             |             |             |
|        |                              |                                           | Frequency $\times$ Age | 4, 120                       | 0.8416  | 0.5014      |                           |             |             |             |             |
|        | 8                            | -1.614 $\pm$ 13.08                        | Age                    | 1, 105                       | 3.272   | 0.0733      | -                         | -           | -           | -           | -           |
|        |                              |                                           | Frequency              | 4, 105                       | 183.5   | < 0.0001*** |                           |             |             |             |             |
|        |                              |                                           | Frequency $\times$ Age | 4, 105                       | 1.073   | 0.3739      |                           |             |             |             |             |
|        | 12                           | -1.168 $\pm$ 13.07                        | Age                    | 1, 105                       | 1.101   | 0.2965      | -                         | -           | -           | -           | -           |
|        |                              |                                           | Frequency              | 4, 105                       | 108.2   | < 0.0001*** |                           |             |             |             |             |
|        |                              |                                           | Frequency $\times$ Age | 4, 105                       | 0.9546  | 0.4357      |                           |             |             |             |             |
|        | 16                           | 1.566 $\pm$ 13.97                         | Age                    | 1, 95                        | 1.4     | 0.2397      | -                         | -           | -           | -           | -           |
|        |                              |                                           | Frequency              | 4, 95                        | 85.03   | < 0.0001*** |                           |             |             |             |             |
|        |                              |                                           | Frequency $\times$ Age | 4, 95                        | 0.779   | 0.5416      |                           |             |             |             |             |
|        | 20                           | -0.2409 $\pm$ 13.14                       | Age                    | 1, 90                        | 0.04386 | 0.8346      | -                         | -           | -           | -           | -           |
|        |                              |                                           | Frequency              | 4, 90                        | 105.1   | < 0.0001*** |                           |             |             |             |             |
|        |                              |                                           | Frequency $\times$ Age | 4, 90                        | 0.4716  | 0.7564      |                           |             |             |             |             |
|        | 24                           | 3.210 $\pm$ 12.73                         | Age                    | 1, 95                        | 7.42    | 0.0077**    | 0.9812                    | 0.9994      | 0.2013      | 0.4459      | 0.1655      |
|        |                              |                                           | Frequency              | 4, 95                        | 89.2    | < 0.0001*** |                           |             |             |             |             |
|        |                              |                                           | Frequency $\times$ Age | 4, 95                        | 1.082   | 0.37        |                           |             |             |             |             |

\* $p < 0.05$ , \*\* $p < 0.01$ , and \*\*\* $p < 0.001$ .

**Table S6.** Age, area, and their interaction effects on the IHC and OHC survival rates detected by two-way ANOVA analysis between 2 month of age (2M) and each corresponding age in male B6 and MSM mice, and the age effects on the same area detected by Sidak's and Tukey's multiple comparisons tests after two-way ANOVA.

| Strain | Cell type | Months of age for comparison | Mean difference $\pm$ SD with 2M (%) | Source of variation | 2M vs each corresponding age |         |             | Multi comparison test |             |             |             |
|--------|-----------|------------------------------|--------------------------------------|---------------------|------------------------------|---------|-------------|-----------------------|-------------|-------------|-------------|
|        |           |                              |                                      |                     | df                           | F value | p value     | 4 kHz                 | 8 kHz       | 16 kHz      | 32 kHz      |
| B6     | IHC       | 10                           | 21.36 $\pm$ 14.45                    | Age                 | 1, 40                        | 35.14   | < 0.0001*** | 0.9894                | 0.5638      | 0.002**     | 0.0006***   |
|        |           |                              |                                      | Area                | 3, 40                        | 3.617   | 0.0211*     |                       |             |             |             |
|        |           |                              |                                      | Area $\times$ Age   | 3, 40                        | 3.609   | 0.0213*     |                       |             |             |             |
|        |           | 18                           | 20.18 $\pm$ 14.78                    | Age                 | 1, 40                        | 38.71   | < 0.0001*** | > 0.9999              | 0.4312      | 0.0009***   | < 0.0001*** |
|        |           |                              |                                      | Area                | 3, 40                        | 6.593   | 0.001**     |                       |             |             |             |
|        |           |                              |                                      | Area $\times$ Age   | 3, 40                        | 6.582   | 0.001**     |                       |             |             |             |
|        |           | 24                           | 36.96 $\pm$ 11.96                    | Age                 | 1, 36                        | 145.5   | < 0.0001*** | 0.0445*               | < 0.0001*** | < 0.0001*** | < 0.0001*** |
|        |           |                              |                                      | Area                | 3, 36                        | 4.126   | 0.013*      |                       |             |             |             |
|        |           |                              |                                      | Area $\times$ Age   | 3, 36                        | 4.118   | 0.0131*     |                       |             |             |             |
|        | OHC       | 10                           | 13.74 $\pm$ 10.28                    | Age                 | 1, 40                        | 20.39   | < 0.0001*** | 0.0106*               | 0.3875      | 0.4036      | 0.0468*     |
|        |           |                              |                                      | Area                | 3, 40                        | 0.6313  | 0.5992      |                       |             |             |             |
|        |           |                              |                                      | Area $\times$ Age   | 3, 40                        | 0.6365  | 0.5959      |                       |             |             |             |
|        |           | 18                           | 50.80 $\pm$ 21.29                    | Age                 | 1, 40                        | 224.4   | < 0.0001*** | < 0.0001***           | < 0.0001*** | 0.1479      | < 0.0001*** |
|        |           |                              |                                      | Area                | 3, 40                        | 18.51   | < 0.0001*** |                       |             |             |             |
|        |           |                              |                                      | Area $\times$ Age   | 3, 40                        | 18.52   | < 0.0001*** |                       |             |             |             |
|        |           | 24                           | 92.57 $\pm$ 7.353                    | Age                 | 1, 36                        | 2710    | < 0.0001*** | < 0.0001***           | < 0.0001*** | < 0.0001*** | < 0.0001*** |
|        |           |                              |                                      | Area                | 3, 36                        | 5.419   | 0.0035**    |                       |             |             |             |
|        |           |                              |                                      | Area $\times$ Age   | 3, 36                        | 5.429   | 0.0035**    |                       |             |             |             |
| MSM    | IHC       | 10                           | 5.709 $\pm$ 5.389                    | Age                 | 1, 40                        | 11.99   | 0.0013**    | 0.3134                | 0.1756      | 0.6838      | 0.2052      |
|        |           |                              |                                      | Area                | 3, 40                        | 0.1589  | 0.9233      |                       |             |             |             |
|        |           |                              |                                      | Area $\times$ Age   | 3, 40                        | 0.1587  | 0.9235      |                       |             |             |             |
|        |           | 18                           | 1.596 $\pm$ 8.249                    | Age                 | 1, 40                        | 0.4026  | 0.5293      | -                     | -           | -           | -           |
|        |           |                              |                                      | Area                | 3, 40                        | 0.2045  | 0.8927      |                       |             |             |             |
|        |           |                              |                                      | Area $\times$ Age   | 3, 40                        | 0.2003  | 0.8955      |                       |             |             |             |
|        |           | 24                           | 2.666 $\pm$ 6.622                    | Age                 | 1, 40                        | 1.709   | 0.1986      | -                     | -           | -           | -           |
|        |           |                              |                                      | Area                | 3, 40                        | 0.07185 | 0.9747      |                       |             |             |             |
|        |           |                              |                                      | Area $\times$ Age   | 3, 40                        | 0.06881 | 0.9762      |                       |             |             |             |
|        | OHC       | 10                           | 14.13 $\pm$ 10.09                    | Age                 | 1, 40                        | 47.59   | < 0.0001*** | < 0.0001***           | < 0.0001*** | 0.9179      | 0.9989      |
|        |           |                              |                                      | Area                | 3, 40                        | 8.832   | 0.0001***   |                       |             |             |             |
|        |           |                              |                                      | Area $\times$ Age   | 3, 40                        | 8.83    | 0.0001***   |                       |             |             |             |
|        |           | 18                           | 23.52 $\pm$ 14.76                    | Age                 | 1, 40                        | 86.09   | < 0.0001*** | < 0.0001***           | < 0.0001*** | 0.5031      | 0.9871      |
|        |           |                              |                                      | Area                | 3, 40                        | 15      | < 0.0001*** |                       |             |             |             |
|        |           |                              |                                      | Area $\times$ Age   | 3, 40                        | 15      | < 0.0001*** |                       |             |             |             |
|        |           | 24                           | 51.36 $\pm$ 22.89                    | Age                 | 1, 40                        | 385.1   | < 0.0001*** | < 0.0001***           | < 0.0001*** | < 0.0001*** | 0.9192      |
|        |           |                              |                                      | Area                | 3, 40                        | 42.23   | < 0.0001*** |                       |             |             |             |
|        |           |                              |                                      | Area $\times$ Age   | 3, 40                        | 42.22   | < 0.0001*** |                       |             |             |             |

\* $p < 0.05$ , \*\* $p < 0.01$ , and \*\*\* $p < 0.001$ .

**Table S7.** Strain, age, and their interaction effects on the ABR thresholds at 4, 8, 16, and 32 kHz detected by two-way ANOVA analysis between B6 and C57BL/6J-Chr 17<sup>MSM</sup>/Ms (B6-Chr17<sup>MSM</sup>) strains, and between B6-*Cdh23*<sup>+/+</sup> and B6-Chr17<sup>MSM</sup> strains, in male mice at 2, 4, 8, 12, and 16 months of age.

| Frequency<br>(kHz) | Source of<br>variation | B6 vs B6-Chr17 <sup>MSM</sup> |                |                | B6- <i>Cdh23</i> <sup>+/+</sup> vs B6-Chr17 <sup>MSM</sup> |                |                |
|--------------------|------------------------|-------------------------------|----------------|----------------|------------------------------------------------------------|----------------|----------------|
|                    |                        | df                            | <i>F</i> value | <i>p</i> value | df                                                         | <i>F</i> value | <i>p</i> value |
| 4                  | Strain                 | 1, 138                        | 0.03443        | 0.8531         | 1, 125                                                     | 21.2           | < 0.0001***    |
|                    | Age                    | 4, 138                        | 35.21          | < 0.0001***    | 4, 125                                                     | 22.3           | < 0.0001***    |
|                    | Age × Strain           | 4, 138                        | 0.2686         | 0.8978         | 4, 125                                                     | 0.7955         | 0.5302         |
| 8                  | Strain                 | 1, 138                        | 12.69          | 0.0005***      | 1, 125                                                     | 3.544          | 0.0621         |
|                    | Age                    | 4, 138                        | 37.33          | < 0.0001***    | 4, 125                                                     | 33.14          | < 0.0001***    |
|                    | Age × Strain           | 4, 138                        | 2.153          | 0.0775         | 4, 125                                                     | 0.4286         | 0.7878         |
| 16                 | Strain                 | 1, 138                        | 34.7           | < 0.0001***    | 1, 125                                                     | 7.226          | 0.0082**       |
|                    | Age                    | 4, 138                        | 66.1           | < 0.0001***    | 4, 125                                                     | 32.5           | < 0.0001***    |
|                    | Age × Strain           | 4, 138                        | 5.116          | 0.0007***      | 4, 125                                                     | 0.9399         | 0.4433         |
| 32                 | Strain                 | 1, 138                        | 87.98          | < 0.0001***    | 1, 125                                                     | 26.59          | < 0.0001***    |
|                    | Age                    | 4, 138                        | 45.73          | < 0.0001***    | 4, 125                                                     | 28.03          | < 0.0001***    |
|                    | Age × Strain           | 4, 138                        | 9.484          | < 0.0001***    | 4, 125                                                     | 3.483          | 0.0098**       |

\*\**p* < 0.01 and \*\*\**p* < 0.001.



**Table S8.** Strain, frequency, and their interaction effects on the DPOAE amplitudes against the  $f_2$  frequencies at 8, 11.3, 16, 22.6, and 32 kHz detected by two-way ANOVA analysis between B6 and B6-Chr17<sup>MSM</sup> strains, and between B6-*Cdh23*<sup>+/-</sup> and B6-Chr17<sup>MSM</sup> strains, in male mice at 4, 8, and 12 months of age.

| Months of age | Source of variation | B6 vs B6-Chr17 <sup>MSM</sup> |                |                | B6- <i>Cdh23</i> <sup>+/-</sup> vs B6-Chr17 <sup>MSM</sup> |                |                |
|---------------|---------------------|-------------------------------|----------------|----------------|------------------------------------------------------------|----------------|----------------|
|               |                     | df                            | <i>F</i> value | <i>p</i> value | df                                                         | <i>F</i> value | <i>p</i> value |
| 4             | Strain              | 1, 115                        | 0.02131        | 0.8842         | 1, 105                                                     | 11.63          | 0.0009***      |
|               | Frequency           | 4, 115                        | 34.39          | < 0.0001***    | 4, 105                                                     | 60.19          | < 0.0001***    |
|               | Frequency × Strain  | 4, 115                        | 4.896          | 0.0011**       | 4, 105                                                     | 1.167          | 0.3295         |
| 8             | Strain              | 1, 115                        | 40.74          | < 0.0001***    | 1, 110                                                     | 6.128          | 0.0148*        |
|               | Frequency           | 4, 115                        | 12.56          | < 0.0001***    | 4, 110                                                     | 17.98          | < 0.0001***    |
|               | Frequency × Strain  | 4, 115                        | 6.946          | < 0.0001***    | 4, 110                                                     | 0.5769         | 0.68           |
| 12            | Strain              | 1, 125                        | 36.71          | < 0.0001***    | 1, 110                                                     | 24.83          | < 0.0001***    |
|               | Frequency           | 4, 125                        | 8.199          | < 0.0001***    | 4, 110                                                     | 10.27          | < 0.0001***    |
|               | Frequency × Strain  | 4, 125                        | 12.89          | < 0.0001***    | 4, 110                                                     | 0.5569         | 0.6944         |

\* $p < 0.05$ , \*\* $p < 0.01$ , and \*\*\* $p < 0.001$ .

**Table S9.** Strain, age, and their interaction effects on the ABR thresholds at 4, 8, 16, and 32 kHz detected by two-way ANOVA analysis between B6 and each *ahl3* congenic strain B6.MSM-*ahl3*/1Tmims (B6.MSM-*ahl3*/1) and B6.MSM-*ahl3*/2Tmims (B6.MSM-*ahl3*/2), and between B6-Chr17<sup>MSM</sup> and each *ahl3* congenic strain, in male mice at 2, 4, 8, 12, and 16 months of age.

| Frequency<br>(kHz) | Source of<br>variation | B6 vs B6.MSM- <i>ahl3</i> /1 |                |                | B6 vs B6.MSM- <i>ahl3</i> /2 |                |                | B6-Chr17 <sup>MSM</sup> vs B6.MSM- <i>ahl3</i> /1 |                |                | B6-Chr17 <sup>MSM</sup> vs B6.MSM- <i>ahl3</i> /2 |                |                |
|--------------------|------------------------|------------------------------|----------------|----------------|------------------------------|----------------|----------------|---------------------------------------------------|----------------|----------------|---------------------------------------------------|----------------|----------------|
|                    |                        | df                           | <i>F</i> value | <i>p</i> value | df                           | <i>F</i> value | <i>p</i> value | df                                                | <i>F</i> value | <i>p</i> value | df                                                | <i>F</i> value | <i>p</i> value |
| 4                  | Strain                 | 1, 119                       | 6.553          | 0.0117*        | 1, 125                       | 0.09831        | 0.7544         | 1, 125                                            | 6.998          | 0.0092**       | 1, 131                                            | 0.233          | 0.6301         |
|                    | Age                    | 4, 119                       | 38.12          | < 0.0001***    | 4, 125                       | 44.49          | < 0.0001***    | 4, 125                                            | 31.85          | < 0.0001***    | 4, 131                                            | 35.93          | < 0.0001***    |
|                    | Age × Strain           | 4, 119                       | 0.6336         | 0.6395         | 4, 125                       | 0.5535         | 0.6968         | 4, 125                                            | 0.9372         | 0.4448         | 4, 131                                            | 1.246          | 0.2949         |
| 8                  | Strain                 | 1, 119                       | 3.799          | 0.0536         | 1, 125                       | 1.391          | 0.2405         | 1, 125                                            | 28.89          | < 0.0001***    | 1, 131                                            | 4.504          | 0.0357*        |
|                    | Age                    | 4, 119                       | 42.61          | < 0.0001***    | 4, 125                       | 35.9           | < 0.0001***    | 4, 125                                            | 37.2           | < 0.0001***    | 4, 131                                            | 29.87          | < 0.0001***    |
|                    | Age × Strain           | 4, 119                       | 0.4851         | 0.7467         | 4, 125                       | 0.3039         | 0.8749         | 4, 125                                            | 4.198          | 0.0032**       | 4, 131                                            | 1.237          | 0.2984         |
| 16                 | Strain                 | 1, 119                       | 2.716          | 0.102          | 1, 125                       | 11.83          | 0.0008***      | 1, 125                                            | 46.83          | < 0.0001***    | 1, 131                                            | 2.135          | 0.1464         |
|                    | Age                    | 4, 119                       | 64.5           | < 0.0001***    | 4, 125                       | 45.21          | < 0.0001***    | 4, 125                                            | 48.24          | < 0.0001***    | 4, 131                                            | 30.5           | < 0.0001***    |
|                    | Age × Strain           | 4, 119                       | 0.2771         | 0.8923         | 4, 125                       | 2.527          | 0.044*         | 4, 125                                            | 4.589          | 0.0017**       | 4, 131                                            | 0.4963         | 0.7385         |
| 32                 | Strain                 | 1, 119                       | 0.02016        | 0.8873         | 1, 125                       | 33.37          | < 0.0001***    | 1, 125                                            | 59.58          | < 0.0001***    | 1, 131                                            | 5.788          | 0.0175*        |
|                    | Age                    | 4, 119                       | 46.34          | < 0.0001***    | 4, 125                       | 47.33          | < 0.0001***    | 4, 125                                            | 36.34          | < 0.0001***    | 4, 131                                            | 42.13          | < 0.0001***    |
|                    | Age × Strain           | 4, 119                       | 0.199          | 0.9384         | 4, 125                       | 2.177          | 0.0754         | 4, 125                                            | 6.002          | 0.0002***      | 4, 131                                            | 3.664          | 0.0073**       |

\**p* < 0.05, \*\**p* < 0.01, and \*\*\**p* < 0.001.

**Table S10.** Strain, frequency, and their interaction effects on the DPOAE amplitudes against the  $f_2$  frequencies at 8, 11.3, 16, 22.6, and 32 kHz detected by two-way ANOVA analysis between B6 and B6.MSM-*ahl3* strains, and between B6-Chr17<sup>MSM</sup> and B6.MSM-*ahl3* /2 strains, in male mice at 4, 8, and 12 months of age.

| Months of age | Source of variation | B6 vs B6.MSM- <i>ahl3</i> /2 |                |                | B6-Chr17 <sup>MSM</sup> vs B6.MSM- <i>ahl3</i> /2 |                |                |
|---------------|---------------------|------------------------------|----------------|----------------|---------------------------------------------------|----------------|----------------|
|               |                     | df                           | <i>F</i> value | <i>p</i> value | df                                                | <i>F</i> value | <i>p</i> value |
| 4             | Strain              | 1, 115                       | 12.36          | 0.0006***      | 1, 90                                             | 15.0           | 0.0002***      |
|               | Frequency           | 4, 115                       | 29.34          | < 0.0001***    | 4, 90                                             | 50.41          | < 0.0001***    |
|               | Strain × Frequency  | 4, 115                       | 4.082          | 0.0039**       | 4, 90                                             | 0.4104         | 0.8008         |
| 8             | Strain              | 1, 110                       | 13.59          | 0.0004***      | 1, 95                                             | 6.299          | 0.0138*        |
|               | Frequency           | 4, 110                       | 11.79          | < 0.0001***    | 4, 95                                             | 14.57          | < 0.0001***    |
|               | Strain × Frequency  | 4, 110                       | 5.302          | 0.0006***      | 4, 95                                             | 0.07799        | 0.9888         |
| 12            | Strain              | 1, 125                       | 2.65           | 0.1061         | 1, 110                                            | 12.81          | 0.0005***      |
|               | Frequency           | 4, 125                       | 14.93          | < 0.0001***    | 4, 110                                            | 9.497          | < 0.0001***    |
|               | Strain × Frequency  | 4, 125                       | 6.918          | < 0.0001***    | 4, 110                                            | 0.99           | 0.4166         |

\* $p < 0.05$ , \*\* $p < 0.01$ , and \*\*\* $p < 0.001$ .

**Table S11.** Strain, age, and their interaction effects on the ABR thresholds at 4, 8, 16, and 32 kHz detected by two-way ANOVA analysis between B6 and B6-Chr12C<sup>MSM</sup> strains in male mice at 2, 4, 8, and 12 months of age.

| Frequency<br>(kHz) | Source of<br>variation | B6 vs B6-Chr12C <sup>MSM</sup> |                |                |
|--------------------|------------------------|--------------------------------|----------------|----------------|
|                    |                        | df                             | <i>F</i> value | <i>p</i> value |
| 4                  | Strain                 | 1, 94                          | 15.85          | 0.0001***      |
|                    | Age                    | 3, 94                          | 11.63          | < 0.0001***    |
|                    | Age × Strain           | 3, 94                          | 1.489          | 0.2225         |
| 8                  | Strain                 | 1, 94                          | 10.21          | 0.0019**       |
|                    | Age                    | 3, 94                          | 23.4           | < 0.0001***    |
|                    | Age × Strain           | 3, 94                          | 0.2939         | 0.8297         |
| 16                 | Strain                 | 1, 94                          | 4.958          | 0.0284*        |
|                    | Age                    | 3, 94                          | 46.63          | < 0.0001***    |
|                    | Age × Strain           | 3, 94                          | 0.2887         | 0.8335         |
| 32                 | Strain                 | 1, 94                          | 32.41          | < 0.0001***    |
|                    | Age                    | 3, 94                          | 75.11          | < 0.0001***    |
|                    | Age × Strain           | 3, 94                          | 3.548          | 0.0174*        |

\**p* < 0.05, \*\**p* < 0.01, and \*\*\**p* < 0.001.

**Table S12.** Strain, age, and their interaction effects on the ABR thresholds at 4, 8, 16, and 32 kHz detected by two-way ANOVA analysis between B6 and B6.MSM-*ahl10*/Tmims (B6.MSM-*ahl10*) strains, and between B6-Chr12C<sup>MSM</sup> and B6.MSM-*ahl10* strains, in male mice at 2, 4, 8, and 12 months of age.

| Frequency<br>(kHz) | Source of<br>variation | B6 vs B6.MSM- <i>ahl10</i> |                |                | B6-Chr12C <sup>MSM</sup> vs B6.MSM- <i>ahl10</i> |                |                |
|--------------------|------------------------|----------------------------|----------------|----------------|--------------------------------------------------|----------------|----------------|
|                    |                        | df                         | <i>F</i> value | <i>p</i> value | df                                               | <i>F</i> value | <i>p</i> value |
| 4                  | Strain                 | 1, 97                      | 16.31          | 0.0001***      | 1, 81                                            | 0.00343        | 0.9534         |
|                    | Age                    | 3, 97                      | 17.08          | < 0.0001***    | 3, 81                                            | 12.68          | < 0.0001***    |
|                    | Age × Strain           | 3, 97                      | 0.387          | 0.7626         | 3, 81                                            | 1.608          | 0.1939         |
| 8                  | Strain                 | 1, 97                      | 13.33          | 0.0004***      | 1, 81                                            | 0.09183        | 0.7626         |
|                    | Age                    | 3, 97                      | 23.69          | < 0.0001***    | 3, 81                                            | 23.45          | < 0.0001***    |
|                    | Age × Strain           | 3, 97                      | 0.2044         | 0.8931         | 3, 81                                            | 0.2525         | 0.8593         |
| 16                 | Strain                 | 1, 97                      | 10.55          | 0.0016**       | 1, 81                                            | 0.3543         | 0.5533         |
|                    | Age                    | 3, 97                      | 51.07          | < 0.0001***    | 3, 81                                            | 41.17          | < 0.0001***    |
|                    | Age × Strain           | 3, 97                      | 0.1814         | 0.9088         | 3, 81                                            | 0.2515         | 0.86           |
| 32                 | Strain                 | 1, 97                      | 37.45          | < 0.0001***    | 1, 81                                            | 1.287          | 0.26           |
|                    | Age                    | 3, 97                      | 54.79          | < 0.0001***    | 3, 81                                            | 71.86          | < 0.0001***    |
|                    | Age × Strain           | 3, 97                      | 3.329          | 0.0228*        | 3, 81                                            | 0.2425         | 0.8664         |

\**p* < 0.05, \*\**p* < 0.01, and \*\*\**p* < 0.001.

**Table S13.** Strain, frequency, and their interaction effects on the DPOAE amplitudes against the  $f_2$  frequencies at 8, 11.3, 16, 22.6, and 32 kHz detected by two-way ANOVA analysis between B6 and B6. MSM-*ahll10* strains in male mice at 4 and 8 months of age.

| Months<br>of age | Source of variation       | B6 vs B6.MSM- <i>ahll10</i> |                |                |
|------------------|---------------------------|-----------------------------|----------------|----------------|
|                  |                           | df                          | <i>F</i> value | <i>p</i> value |
| 4                | Strain                    | 1, 140                      | 22.18          | < 0.0001***    |
|                  | Frequency                 | 4, 140                      | 38.76          | < 0.0001***    |
|                  | Frequency $\times$ Strain | 4, 140                      | 5.562          | 0.0003***      |
| 8                | Strain                    | 1, 115                      | 12.18          | 0.0007***      |
|                  | Frequency                 | 4, 115                      | 21.56          | < 0.0001***    |
|                  | Frequency $\times$ Strain | 4, 115                      | 0.7733         | 0.5448         |

\*\*\* $p < 0.001$ .

**Table S14.** Predicted neutral amino acid substitutions between B6 and MSM mice in the protein-coding genes within MSM-*ahl3* /2 and MSM-*ahl10* congenic regions.

| Congenic region | Protein       | Amino acid substitution |     |     | Possible impact |         |            |
|-----------------|---------------|-------------------------|-----|-----|-----------------|---------|------------|
|                 |               | Position                | B6  | MSM | SIFT            | PROVEAN | PolyPhen-2 |
| <i>ahl3</i> /2  | FBXL17        | 72                      | Ala | Thr | Tolerated       | Neutral | Benign     |
|                 | A930002H24RIK | 6                       | Leu | Phe | NA*             | Neutral | NA         |
|                 |               | 15                      | Thr | Ile | NA              | Neutral | NA         |
|                 |               | 16                      | Ala | Val | NA              | Neutral | NA         |
|                 |               | 205                     | Cys | Arg | NA              | Neutral | NA         |
|                 |               | 233                     | Arg | Gln | NA              | Neutral | NA         |
|                 |               | 242                     | Glu | Gly | NA              | Neutral | NA         |
|                 |               | 271                     | Ser | Trp | NA              | Neutral | NA         |
|                 |               | 341                     | Gly | Glu | NA              | Neutral | NA         |
|                 | PJA2          | 108                     | Ala | Thr | Tolerated       | Neutral | Benign     |
|                 |               | 141                     | Arg | His | Tolerated       | Neutral | Benign     |
|                 |               | 152                     | Asn | Ser | Tolerated       | Neutral | Benign     |
|                 |               | 291                     | His | Arg | Tolerated       | Neutral | Benign     |
|                 | MAN2A1        | 764                     | Pro | Ser | Tolerated       | Neutral | Benign     |
|                 |               | 924                     | Ala | Val | Tolerated       | Neutral | Benign     |
|                 | 4930583I09RIK | 40                      | Asn | Lys | NA              | Neutral | NA         |
|                 |               | 92                      | Leu | Trp | NA              | Neutral | NA         |
|                 | TMEM232       | 217                     | Val | Met | NA              | Neutral | Benign     |
|                 |               | 237                     | Phe | Leu | NA              | Neutral | Benign     |
|                 |               | 263                     | Val | Ile | NA              | Neutral | Benign     |
|                 |               | 360                     | Val | Ile | NA              | Neutral | Benign     |
|                 |               | 610                     | Glu | Ala | NA              | Neutral | Benign     |
|                 | TXNDC2        | 100                     | Pro | Ser | Tolerated       | Neutral | Benign     |
|                 |               | 103                     | Gly | Glu | Tolerated       | Neutral | Benign     |
|                 |               | 175                     | Pro | Ser | Tolerated       | Neutral | Benign     |
|                 |               | 205                     | Pro | Ser | Tolerated       | Neutral | Benign     |
|                 |               | 219                     | Gln | Pro | Tolerated       | Neutral | Benign     |
|                 | PPP4R1        | 4                       | Asn | Ser | Tolerated       | Neutral | Benign     |
|                 |               | 26                      | Ser | Pro | Tolerated       | Neutral | Benign     |
|                 |               | 180                     | Asp | Glu | Tolerated       | Neutral | Benign     |
|                 |               | 236                     | Ala | Val | Tolerated       | Neutral | Benign     |
|                 | RALBP1        | 9                       | Ser | Thr | Tolerated       | Neutral | Benign     |
|                 |               | 53                      | Val | Ile | Tolerated       | Neutral | Benign     |
|                 |               | 65                      | Asp | Glu | Tolerated       | Neutral | Benign     |
|                 |               | 183                     | Ala | Ser | Tolerated       | Neutral | Benign     |
|                 |               | 195                     | Val | Ala | Tolerated       | Neutral | Benign     |
|                 |               | 617                     | Ile | Thr | Tolerated       | Neutral | Benign     |
|                 | TWSG1         | 19                      | Leu | Phe | Tolerated       | Neutral | Benign     |
|                 | ANKRD12       | 509                     | Tyr | Phe | Tolerated       | Neutral | Benign     |
|                 |               | 988                     | Ala | Val | Tolerated       | Neutral | Benign     |
|                 |               | 1153                    | Asn | Ser | Tolerated       | Neutral | Benign     |
|                 |               | 1420                    | Ile | Thr | Tolerated       | Neutral | Benign     |
|                 | DDX11         | 93                      | Thr | Ile | Tolerated       | Neutral | Benign     |

\*NA, Not annotated.

**Table S14.** Continued.

| Congenic region | Protein  | Amino acid substitution |     |     | Possible impact |         |            |
|-----------------|----------|-------------------------|-----|-----|-----------------|---------|------------|
|                 |          | Position                | B6  | MSM | SIFT            | PROVEAN | PolyPhen-2 |
| <i>ahl3</i> /2  | MTCL1    | 90                      | Gly | Ser | Tolerated       | Neutral | Benign     |
|                 |          | 229                     | Ala | Thr | Tolerated       | Neutral | Benign     |
|                 |          | 779                     | Gly | Glu | Tolerated       | Neutral | Benign     |
|                 |          | 780                     | Ser | Arg | Tolerated       | Neutral | Benign     |
|                 |          | 783                     | Ser | Pro | Tolerated       | Neutral | Benign     |
|                 | THEMIS3  | 149                     | Lys | Glu | Tolerated       | Neutral | NA         |
|                 |          | 228                     | Thr | Met | Tolerated       | Neutral | NA         |
|                 |          | 313                     | Ser | Thr | Tolerated       | Neutral | NA         |
|                 |          | 355                     | Glu | Gln | Tolerated       | Neutral | NA         |
|                 |          | 362                     | Gln | Arg | Tolerated       | Neutral | NA         |
|                 | PTPRM    | 562                     | Val | Ala | Tolerated       | Neutral | NA         |
|                 |          | 607                     | Met | Val | Tolerated       | Neutral | Benign     |
|                 | LRRC30   | 120                     | Val | Ile | Tolerated       | Neutral | Benign     |
|                 |          | 405                     | Asn | Asp | Tolerated       | Neutral | Benign     |
|                 |          | 822                     | Val | Ile | Tolerated       | Neutral | Benign     |
|                 | LAMA1    | 920                     | Ile | Val | Tolerated       | Neutral | Benign     |
|                 |          | 1295                    | Arg | Gln | Tolerated       | Neutral | Benign     |
|                 |          | 1376                    | Ala | Ser | Tolerated       | Neutral | Benign     |
|                 |          | 1646                    | Arg | Cys | Tolerated       | Neutral | Benign     |
|                 |          | 1800                    | Gln | Arg | Tolerated       | Neutral | Benign     |
|                 |          | 1839                    | Thr | Ala | Tolerated       | Neutral | Benign     |
|                 |          | 1853                    | Arg | Asn | Tolerated       | Neutral | Benign     |
|                 |          | 1925                    | Met | Thr | Tolerated       | Neutral | Benign     |
|                 |          | 1964                    | Ser | Gly | Tolerated       | Neutral | Benign     |
|                 |          | 1974                    | Met | Leu | Tolerated       | Neutral | Benign     |
|                 |          | 2022                    | Ala | Val | Tolerated       | Neutral | Benign     |
|                 |          | 2522                    | Ala | Thr | Tolerated       | Neutral | Benign     |
|                 |          | 2872                    | Ile | Met | Tolerated       | Neutral | Benign     |
|                 |          | 2983                    | Gly | Ser | Tolerated       | Neutral | Benign     |
|                 |          | 3005                    | Ser | Ala | Tolerated       | Neutral | Benign     |
|                 | ARHGAP28 | 223                     | Ser | Asn | Tolerated       | Neutral | Benign     |
|                 |          | 300                     | Val | Met | Tolerated       | Neutral | Benign     |
|                 | L3MBTL4  | 37                      | Thr | Ala | Tolerated       | Neutral | Benign     |
|                 |          | 66                      | Ala | Val | Tolerated       | Neutral | Benign     |
|                 | TMEM200C | 262                     | Val | Met | Tolerated       | Neutral | Benign     |
|                 |          | 360                     | Thr | Asn | Tolerated       | Neutral | Benign     |
|                 |          | 451                     | Ala | Val | Tolerated       | Neutral | Benign     |
|                 |          | 458                     | Pro | Ser | Tolerated       | Neutral | Benign     |
|                 | EPB41L3  | 52                      | Ala | Thr | Tolerated       | Neutral | Benign     |
|                 |          | 775                     | Thr | Ala | Tolerated       | Neutral | Benign     |
| <i>ahl10</i>    | KIF3C    | 201                     | Ala | Thr | Tolerated       | Neutral | Benign     |
|                 | ASXL2    | 351                     | Ser | Pro | Tolerated       | Neutral | Benign     |
|                 |          | 527                     | Asp | Glu | Tolerated       | Neutral | Benign     |
|                 |          | 552                     | Val | Ala | Tolerated       | Neutral | Benign     |
|                 |          | 977                     | Arg | Lys | Tolerated       | Neutral | Benign     |
|                 |          | 1197                    | Pro | Ser | Tolerated       | Neutral | Benign     |



**Table S14.** Continued.

| Congenic region | Protein | Amino acid substitution |     |     | Possible impact |         |            |
|-----------------|---------|-------------------------|-----|-----|-----------------|---------|------------|
|                 |         | Position                | B6  | MSM | SIFT            | PROVEAN | PolyPhen-2 |
| <i>ahl10</i>    | DNMT3A  | 151                     | Gln | Pro | Tolerated       | Neutral | Benign     |
|                 | DNAJC27 | 3                       | Thr | Ser | Tolerated       | Neutral | Benign     |
|                 | ADCY3   | 512                     | Val | Met | Tolerated       | Neutral | Benign     |
|                 | CENPO   | 30                      | Ile | Val | Tolerated       | Neutral | Benign     |
|                 |         | 39                      | Ala | Thr | Tolerated       | Neutral | Benign     |
|                 | NCOA1   | 863                     | Thr | Ala | Tolerated       | Neutral | Benign     |
|                 | ITSN2   | 995                     | Val | Ile | Tolerated       | Neutral | NA         |
|                 |         | 996                     | Arg | Thr | Tolerated       | Neutral | NA         |
|                 | FAM228A | 32                      | Leu | Ile | Tolerated       | Neutral | Benign     |
|                 |         | 161                     | Leu | Pro | Tolerated       | Neutral | Benign     |
|                 |         | 165                     | Pro | Thr | Tolerated       | Neutral | Benign     |
|                 | WDCP    | 33                      | Arg | His | Tolerated       | Neutral | Benign     |
|                 |         | 83                      | Lys | Met | Tolerated       | Neutral | Benign     |
|                 |         | 243                     | Gly | Ser | Tolerated       | Neutral | Benign     |
|                 |         | 503                     | Val | Ile | Tolerated       | Neutral | Benign     |
|                 |         | 543                     | Lys | Asn | Tolerated       | Neutral | Benign     |
|                 |         | 572                     | Thr | Met | Tolerated       | Neutral | Benign     |
|                 |         | 581                     | Val | Ile | Tolerated       | Neutral | Benign     |
|                 | MFS2D2B | 170                     | Ala | Thr | Tolerated       | Neutral | Benign     |
|                 | UBXN2A  | 15                      | Ala | Val | Tolerated       | Neutral | Benign     |
|                 | ATAD2B  | 1115                    | Arg | Gln | Tolerated       | Neutral | Benign     |
|                 | KLHL29  | 195                     | His | Arg | NA              | Neutral | NA         |
|                 |         | 978                     | Val | Met | Tolerated       | Neutral | Benign     |
|                 | APOB    | 124                     | Thr | Met | Tolerated       | Neutral | Benign     |
|                 |         | 244                     | Val | Ile | Tolerated       | Neutral | Benign     |
|                 |         | 1391                    | Lys | Arg | Tolerated       | Neutral | Benign     |
|                 | GDF7    | 57                      | Ala | Thr | Tolerated       | Neutral | NA         |
|                 |         | 244                     | Asp | Glu | Tolerated       | Neutral | NA         |
|                 | HS1BP3  | 359                     | Pro | Thr | NA              | Neutral | Benign     |
|                 | SLC7A15 | 431                     | Ala | Val | Tolerated       | Neutral | Benign     |
|                 | LAPTM4A | 25                      | Gly | Ser | Tolerated       | Neutral | NA         |
|                 | MATN3   | 25                      | Ser | Pro | Tolerated       | Neutral | Benign     |
|                 |         | 41                      | Gly | Val | Tolerated       | Neutral | Benign     |
|                 |         | 264                     | Met | Val | Tolerated       | Neutral | Benign     |
|                 |         | 281                     | Lys | Arg | Tolerated       | Neutral | Benign     |
|                 |         | 386                     | Arg | Gln | Tolerated       | Neutral | Benign     |
|                 |         | 390                     | Ala | Ser | Tolerated       | Neutral | Benign     |
|                 | TTC32   | 3                       | Leu | Ala | Tolerated       | Neutral | Benign     |
|                 |         | 70                      | Asp | Glu | Tolerated       | Neutral | Benign     |
